# Supplementary material
Source: HighWire-hosted journal article supplement (http://jneurosci.org/highwire/filestream/602242/field_highwire_adjunct_files/0/Supplemental_Figures.pdf)
Supplement: Supplemental_Figures.pdf [file Supplemental_Figures.pdf]

## **Supplemental information**

### **Distinct neural substrates of duration-based and beat-based auditory timing**

Running title: Absolute and relative timing of auditory rhythmic sequences

Sundeep Teki<sup>1,2</sup>, Manon Grube<sup>1</sup>, Sukhbinder Kumar<sup>1,2</sup>, and Timothy D. Griffiths<sup>1,2</sup>

<sup>1</sup> Wellcome Trust Centre for Neuroimaging, University College London,

London WC1N 3BG, United Kingdom;

<sup>2</sup> Newcastle Auditory Group, Medical School, Newcastle University,

Newcastle-upon-Tyne NE2 4HH, United Kingdom.

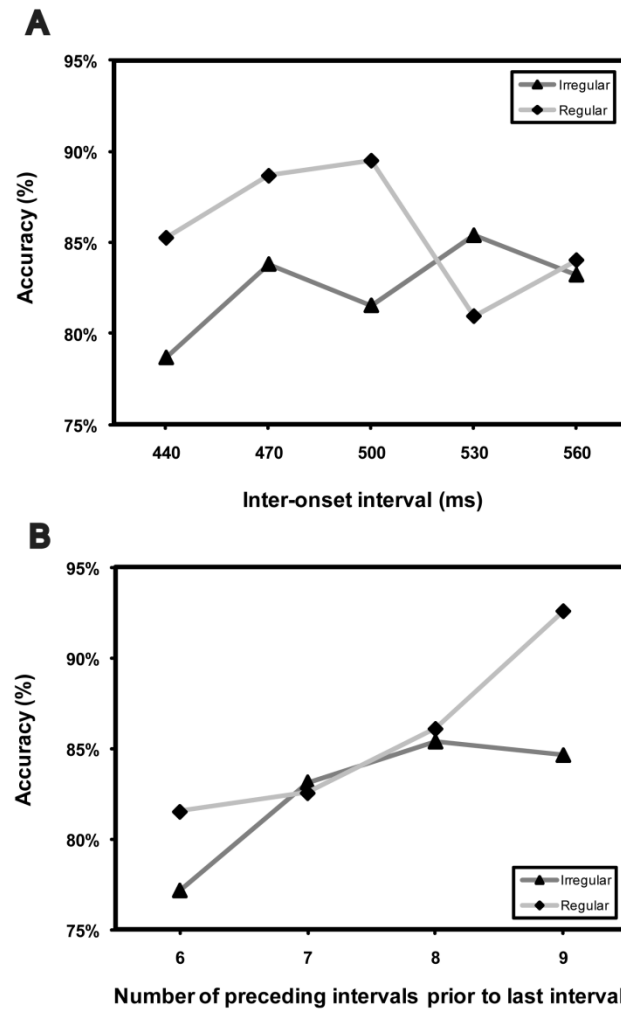

**Figure S1. Effects of rhythmic context on accuracy.** (A) Accuracy for timing of irregular (dark grey) and regular (light grey) sequences as a function of the different inter-onset intervals. Highest accuracy is obtained for regular sequences with an ioi of 500 ms. (B) Accuracy for timing of irregular and regular sequences as a function of the number of intervals prior to the last interval. Accuracy for both irregular and regular sequences increases with the number of preceding intervals and is greatest for regular sequences with nine preceding intervals.

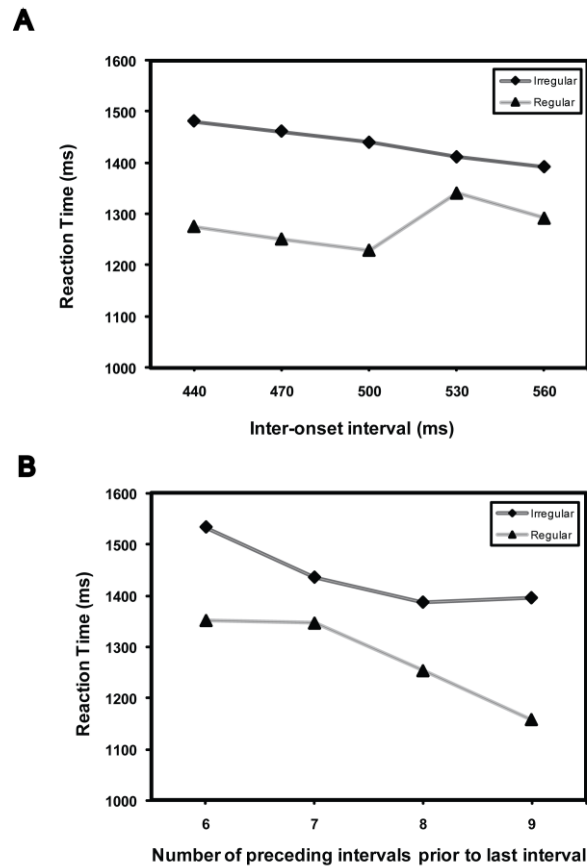

**Figure S2. Effects of rhythmic context on reaction times.** (A) Reaction times for timing of irregular (dark grey) and regular (light grey) sequences as a function of the different inter-onset intervals. Reaction times decrease with increase in inter-onset intervals and the lowest reaction times were obtained for timing of regular sequences with an ioi of 500 ms. (B) Reaction times for timing of irregular and regular sequences as a function of the number of intervals prior to the last interval. Reaction time for timing of both irregular and regular sequences decrease with the number of preceding intervals and is lowest for regular sequences with nine preceding intervals.
